# Supplementary material for: Restoration of Grassland Improves Soil Infiltration Capacity in Water-Wind Erosion Crisscross Region of China’s Loess Plateau
Source: MDPI journal article supplement (doi:10.3390/land12081485), 2023-07-27
Supplement: s1 [file s1]

Restoration of Grassland Improves Soil Infiltration Capacity in Water-Wind Erosion  
Crisscross Region of China's Loess Plateau

Authors: Xiuzi Ren<sup>1</sup>, Xiaohong Chai<sup>1</sup>, Yuanyuan Qu<sup>1</sup>, Yuanhui Xu, Farhat Ullah Khan<sup>2</sup>, Junfeng Wang<sup>1</sup>, Palixiati Geming<sup>1</sup>, Weiwei Wang<sup>1</sup>, Qi Zhang<sup>1</sup>, Qinxuan Wu<sup>1</sup>, Xuexuan Xu<sup>2\*</sup>, Feng Du<sup>2\*</sup>

Table S1. Soil mechanical composition of plots.

| Plots | Depth<br>(cm) | Soil mechanical composition/%         |                                              |                                      |
|-------|---------------|---------------------------------------|----------------------------------------------|--------------------------------------|
|       |               | Clay particle<br>( $\Phi < 0.002$ mm) | Silt particle<br>( $0.02 > \Phi > 0.002$ mm) | Sand particle<br>( $\Phi > 0.02$ mm) |
| Aeo.f | 0-10          | 4.16±0.57Cc                           | 5.57±0.75Cc                                  | 90.27±1.20Aa                         |
|       | 10-20         | 5.84±0.39Bbc                          | 7.81±0.54Bc                                  | 86.99±3.96Ab                         |
|       | 20-30         | 9.28±0.81Aab                          | 15.21±0.95Ab                                 | 75.51±1.74Bc                         |
| Aeo.g | 0-10          | 3.64±0.61Ac                           | 5.61±1.12Ac                                  | 90.75±1.70Ba                         |
|       | 10-20         | 1.82±0.12Bd                           | 3.19±0.63Bd                                  | 94.99±0.71Aa                         |
|       | 20-30         | 3.83±0.37Ae                           | 5.99±0.58Ad                                  | 90.18±0.85Ba                         |
| San.f | 0-10          | 6.97±0.16ab                           | 11.79±2.03b                                  | 80.89±1.09b                          |
|       | 10-20         | 7.35±1.42ab                           | 12.42±1.38b                                  | 80.23±2.80c                          |
|       | 20-30         | 6.13±1.12cd                           | 10.87±1.77c                                  | 83.01±2.84b                          |
| San.g | 0-10          | 7.45±0.62Aab                          | 12.30±0.29Ab                                 | 80.47±1.14bBc                        |
|       | 10-20         | 4.19±0.83Bc                           | 8.86±1.07Bc                                  | 89.96±2.89Ab                         |
|       | 20-30         | 7.57±1.18Abc                          | 13.91±1.24Ab                                 | 82.76±1.12Bb                         |
| Loe.f | 0-10          | 8.29±1.88a                            | 15.24±0.85Ca                                 | 76.21±5.27c                          |
|       | 10-20         | 8.71±0.61a                            | 16.37±1.84BCa                                | 74.92±2.45d                          |
|       | 20-30         | 10.41±1.01a                           | 19.42±2.03Aa                                 | 70.17±2.96d                          |
| Loe.g | 0-10          | 5.81±0.28b                            | 12.52±0.52Ab                                 | 82.14±0.30b                          |
|       | 10-20         | 5.97±1.46b                            | 11.96±0.78Ab                                 | 82.07±2.02bc                         |
|       | 20-30         | 5.31±1.25de                           | 10.00±0.99Bc                                 | 85.26±2.26b                          |

Note: Different capital letters indicate significant differences between the different soil depths for the same land at the  $P=0.05$  level. Different lowercase letters indicate significant differences between the different land for the same soil depth at the  $P=0.05$  level. This is applicable for the following figures and labels as well. Aeo. f, aeolian sandy soil cropland; Aeo. g, aeolian sandy soil grassland; Loe. f, loess soil cropland; Loe. g, loess soil grassland; San. f, Pisha sand soil cropland; San. g, Pisha sand soil grassland.

Table S2. The references of proposed mechanisms for each pathway associated with the model  
(see Figure S2)

| Pathway                      | References                                                           |
|------------------------------|----------------------------------------------------------------------|
| Soil texture → Root traits   | Borden et al., 2020; Plante et al., 2014.                            |
| Soil texture → SOM           | Haddix et al., 2020; Schweizer et al., 2019; Wiesmeier et al., 2019. |
| Soil texture → aggregates    | Bronick and Lal, 2005; Ge et al., 2019; Schweizer et al., 2019.      |
| Soil texture → Soil porosity | Regelink et al., 2015; Gu et al., 2018.                              |
| Soil texture → Infiltration  | Fischer et al., 2014; Marquart et al., 2020; Zhu et al., 2020.       |
| Root traits → SOM            | Hao et al., 2020; Li et al., 2020.                                   |
| Root traits → aggregates     | Gould et al., 2016; Demenois et al., 2018.                           |
| Root traits → Soil porosity  | Tang et al., 2018; Bodner et al., 2014; Hao et al., 2020.            |
| Root traits → Infiltration   | Lu et al., 2020; Liu et al., 2020; Jiang et al., 2018.               |
| SOM → aggregates             | Six et al., 2004; Demenois et al., 2018.                             |
| SOM → Soil porosity          | Fischer et al., 2014.                                                |
| SOM → Infiltration           | Neris et al., 2012; Huang et al., 2016; Anderson et al., 2020.       |
| aggregates → Soil porosity   | Regelink et al., 2015; Bronick and Lal, 2005.                        |
| aggregates → Infiltration    | Neris et al., 2012; Hao et al., 2020; Huang et al., 2016.            |
| Soil porosity → Infiltration | Zhu et al., 2022; Marquart et al., 2020.                             |

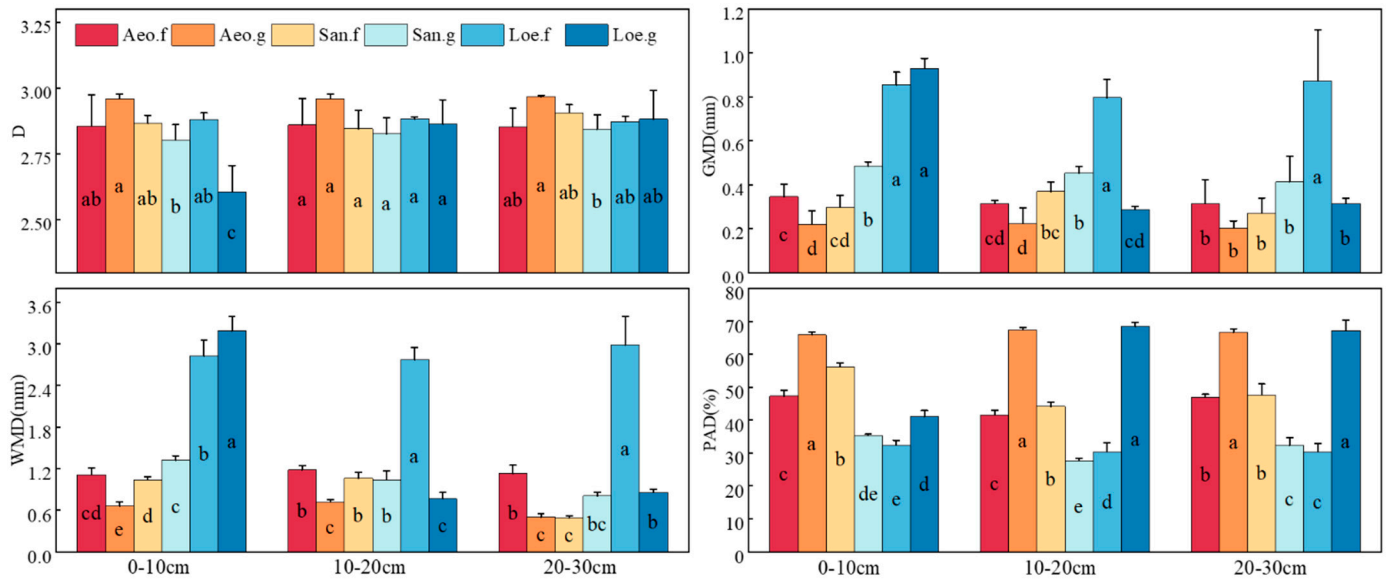

Figure S1. Characteristics of soil aggregates in various lands, D: fractal dimension; GMD: geometric mean diameter; WMD: aggregate mean weight diameter; PAD: Aggregate destruction rate; Different lowercase letters indicate significant differences between the different land at the P=0.05 level. Aeo. f, aeolian sandy soil cropland; Aeo. g, aeolian sandy soil grassland; San. f, Pisha sand soil cropland; San. g, Pisha sand soil grassland; Loe. f, loess soil cropland; Loe. g, loess soil grassland.

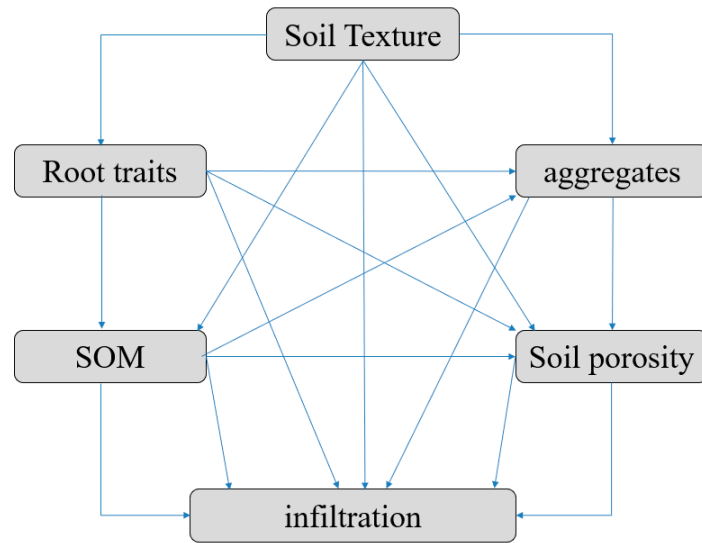

Figure S2. A structural equation modeling (SEM) of the possible pathways of these key factors on soil infiltrability during the ecological restoration. Proposed mechanisms for each path are described in Table S2

## References

- Anderson, R.L., Brye, K.R. and Wood, L.S., 2020. Landuse and soil property effects on infiltration into Alfisols in the lower Mississippi River valley, USA. *Geoderma Regional*: e00297.
- Bodner, G., Leitner, D. and Kaul, H.P., 2014. Coarse and fine root plants affect pore size distributions differently. *Plant and Soil*, 380(1): 133-151.
- Borden, K.A. et al., 2020. Soil texture moderates root functional traits in agroforestry systems across a climatic gradient. *Agriculture, Ecosystems & Environment*, 295: 106915.
- Bronick, C.J. and Lal, R., 2005. Soil structure and management: a review. *Geoderma*, 124(1): 3-22.
- Demenois, J. et al., 2018. Impact of plant root functional traits and associated mycorrhizas on the aggregate stability of a tropical Ferralsol. *Geoderma*, 312: 6-16.
- Fischer, C. et al., 2014. Plant species diversity affects infiltration capacity in an experimental grassland through changes in soil properties. *Plant and Soil*, 397(1-2): 1-16.
- Ge, N. et al., 2019. Soil texture determines the distribution of aggregate-associated carbon, nitrogen and phosphorous under two contrasting land use types in the Loess Plateau. *CATENA*, 172: 148-157.
- Gould, I.J., Quinton, J.N., Weigelt, A., De Deyn, G.B. and Bardgett, R.D., 2016. Plant diversity and root traits benefit physical properties key to soil function in grasslands. *Ecology Letters*, 19(9): 1140-1149.
- Gu, C. et al., 2018. Influence of vegetation restoration on soil physical properties in the Loess Plateau, China. *Journal of Soils and Sediments*, 19(2): 716-728.
- Haddix, M.L. et al., 2020. Climate, carbon content, and soil texture control the independent formation and persistence of particulate and mineral-associated organic matter in soil. *Geoderma*, 363:

114160.

Hao, H., Wei, Y., Cao, D., Guo, Z. and Shi, Z., 2020. Vegetation restoration and fine roots promote soil infiltrability in heavy-textured soils. *Soil and Tillage Research*, 198: 104542.

Huang, Z., Tian, F.P., Wu, G.L., Liu, Y. and Dang, Z.Q., 2016. Legume Grasslands Promote Precipitation Infiltration better than Gramineous Grasslands in arid Regions. *Land Degradation & Development*, 28(1): 309-316.

Jiang, X.J. et al., 2018. Effects of three morphometric features of roots on soil water flow behavior in three sites in China. *Geoderma*, 320: 161-171.

Li, J. et al., 2020. Rhizosphere effects promote soil aggregate stability and associated organic carbon sequestration in rocky areas of desertification. *Agriculture, Ecosystems & Environment*, 304: 107126.

Liu, Y., Guo, L., Huang, Z., López-Vicente, M. and Wu, G.-L., 2020. Root morphological characteristics and soil water infiltration capacity in semi-arid artificial grassland soils. *Agricultural Water Management*, 235: 106153.

Lu, J. et al., 2020. Root-induced changes of soil hydraulic properties – A review. *Journal of Hydrology*, 589: 125203.

Marquart, A., Eldridge, D.J., Geissler, K., Lobas, C. and Blaum, N., 2020. Interconnected effects of shrubs, invertebrate-derived macropores and soil texture on water infiltration in a semi-arid savanna rangeland. *Land Degradation & Development*, 31(16): 2307-2318.

Neris, J., Jiménez, C., Fuentes, J., Morillas, G. and Tejedor, M., 2012. Vegetation and land-use effects on soil properties and water infiltration of Andisols in Tenerife (Canary Islands, Spain). *CATENA*, 98: 55-62.

Plante, P.-M., Rivest, D., Vézina, A. and Vanasse, A., 2014. Root distribution of different mature tree

- species growing on contrasting textured soils in temperate windbreaks. *Plant and Soil*, 380(1): 429-439.
- Regelink, I.C. et al., 2015. Linkages between aggregate formation, porosity and soil chemical properties. *Geoderma*, 247-248: 24-37.
- Schweizer, S.A., Bucka, F.B., Graf-Rosenfellner, M. and Kögel-Knabner, I., 2019. Soil microaggregate size composition and organic matter distribution as affected by clay content. *Geoderma*, 355: 113901.
- Six, J., Bossuyt, H., Degryze, S. and Denef, K., 2004. A history of research on the link between (micro)aggregates, soil biota, and soil organic matter dynamics. *Soil and Tillage Research*, 79(1): 7-31.
- Tang, B., Jiao, J., Yan, F. and Li, H., 2018. Variations in soil infiltration capacity after vegetation restoration in the hilly and gully regions of the Loess Plateau, China. *Journal of Soils and Sediments*, 19(3): 1456-1466.
- Wiesmeier, M. et al., 2019. Soil organic carbon storage as a key function of soils - A review of drivers and indicators at various scales. *Geoderma*, 333: 149-162.
- Zhu, P., Zhang, G., Wang, H. and Xing, S., 2020. Soil infiltration properties affected by typical plant communities on steep gully slopes on the Loess Plateau of China. *Journal of Hydrology*, 590: 125535.
- Zhu, P., Zhang, G. and Zhang, B., 2022. Soil saturated hydraulic conductivity of typical revegetated plants on steep gully slopes of Chinese Loess Plateau. *Geoderma*, 412: 115717.
